# Supplementary material for: A Snapshot of the Taxonomic Composition and Metabolic Activity of the Microbial Community in an Arctic Harbour (Ny-Ålesund, Kongsfjorden, Svalbard)
Source: MDPI journal article supplement (doi:10.3390/jmse11051018), 2023-05-10
Supplement: s1 [file s1]

**Table S1** (supplementary file). List of the clones isolated with indication of their GenBank accession number, their closest hit with its accession number and percentage of identification.

| GenBank ACCESSION<br>number | Isolate Clone | abundance | Closest Hit                                              | Accession No. | ID (%) |
|-----------------------------|---------------|-----------|----------------------------------------------------------|---------------|--------|
| OQ753781                    | Clone G10     | 2         | <i>Vibrio</i> sp. BC-R3 clone 279.3                      | DQ357806      | 96.12  |
| OQ753783                    | clone H06     | 2         | <i>Glaciecola</i> sp. ANT9133                            | AY167283      | 83.75  |
| OQ753792                    | clone G08     | 6         | <i>Glaciecola</i> sp. ANT9133                            | AY167283      | 91.87  |
| OQ753776                    | clone H02     | 45        | <i>Pseudoalteromonas paragorgicola</i>                   | LN624602      | 97.75  |
| OQ753822                    | clone C05     | 4         | <i>Amphritea japonica</i> ATCC BAA-1530 strain JAMM 1866 | NR_041616     | 84.87  |
| OQ753779                    | clone B03     | 2         | Uncultured bacterium clone F9P1210_S_I09                 | HQ671881      | 94.62  |
| OQ753801                    | clone D04     | 2         | Uncultured bacterium clone 1C226904                      | EU799322      | 89.62  |
| OQ753821                    | clone A08     | 2         | Uncultured bacterium clone ARKDMS-58                     | AF468261      | 89.25  |
| OQ753775                    | clone E09     | 9         | <i>Psychrobacter immobilis</i> strain ATCC 43116         | U393999       | 94.12  |
| OQ753820                    | clone D07     | 2         | <i>Congregibacter</i> sp. strain IMCC43200               | OP672399      | 95.25  |
| OQ753788                    | clone A03     | 2         | <i>Zhongshania aliphaticivorans</i> strain SM-2          | CP014544      | 95.75  |
| OQ753784                    | clone E03     | 2         | Uncultured marine bacterium clone SHTA461                | GU235499      | 89.62  |
| OQ753818                    | clone H04     | 2         | Uncultured marine bacterium clone SHTA461                | GU235499      | 81.25  |
| OQ753785                    | clone A01     | 6         | uncultured marine bacterium clone 16_08_02E10            | FR684711      | 96.12  |
| OQ753796                    | clone G04     | 2         | uncultured marine bacterium clone 16_03_05B08            | FR684239      | 93.41  |
| OQ753809                    | clone A05     | 4         | Uncultured gamma proteobacterium clone VHS-B5-70         | DQ395044      | 92.87  |
| OQ753800                    | clone F07     | 2         | uncultured marine bacterium clone 16_02_04C08            | FR683722      | 83.75  |
| OQ753798                    | clone F08     | 2         | uncultured marine bacterium clone 16_02_04C08            | FR683722      | 81.25  |
| OQ753799                    | clone H08     | 2         | uncultured marine bacterium clone 16_02_04C08            | FR683722      | 93.75  |
| OQ753794                    | clone G02     | 2         | Uncultured marine bacterium clone SPOTSAPR01_5m19        | DQ009364      | 98.37  |
| OQ753808                    | clone D01     | 2         | Bacterium SH5-11                                         | JQ269263      | 91.87  |
| OQ753777                    | clone A09     | 6         | Bacterium SH5-11                                         | JQ269263      | 91.43  |
| OQ753793                    | clone G07     | 4         | Bacterium SH5-11                                         | JQ269263      | 90.0   |
| OQ753812                    | clone C04     | 2         | Bacterium SH5-11                                         | JQ269263      | 86.25  |
| OQ753815                    | clone B06     | 4         | Bacterium SH5-11                                         | JQ269263      | 91.25  |
| OQ753811                    | clone C08     | 2         | Uncultured bacterium clone S11-93                        | EU287276      | 96.52  |
| OQ753806                    | clone D08     | 2         | Bacterium SH5-11                                         | JQ269263      | 80.31  |
| OQ753816                    | clone B06     | 2         | Bacterium SH5-11                                         | JQ269263      | 97.5   |
| OQ753786                    | clone H01     | 20        | Uncultured bacterium clone ARKIA-123                     | AF468294      | 92.17  |
| OQ753814                    | clone C01     | 2         | Uncultured bacterium clone S11-93                        | EU287276      | 96.08  |
| OQ753799                    | clone H03     | 2         | Uncultured gamma proteobacterium clone HMMVCen-12        | AJ704665      | 92.61  |
| OQ753805                    | clone A01     | 2         | Uncultured bacterium clone F9P41300_J14                  | HQ673471      | 96.08  |
| OQ753778                    | clone D11     | 2         | <i>Sulfitobacter</i> sp. AECF-21b                        | JQ618837      | 92.60  |
| OQ753803                    | clone E02     | 4         | Uncultured bacterium clone D6DMBB08                      | HQ216251      | 98.60  |
| OQ753802                    | clone E04     | 4         | Uncultured bacterium clone D6DMAD12                      | HQ216313      | 95.90  |
| OQ753795                    | clone G03     | 2         | uncultured marine bacterium clone 16_04_02G11            | FR685098      | 94.37  |
| OQ753813                    | clone C03     | 2         | Uncultured bacterium clone 3C003281                      | EU801902      | 93.25  |
| OQ753787                    | clone F04     | 2         | Uncultured bacterium clone 1C227513                      | EU799851      | 97.18  |
| OQ753810                    | clone C09     | 2         | <i>Flavobacterium frigidarium</i> isolate S3-9           | AY771722      | 98.12  |
| OQ753817                    | clone B02     | 4         | Uncultured bacterium clone 2L2SGXO601                    | FJ469304      | 98.05  |
| OQ753782                    | clone C10     | 2         | <i>Polaribacter</i> sp. W-2                              | DQ923436      | 98.12  |
| OQ753804                    | clone D05     | 4         | <i>Polaribacter sejongensis</i> strain KOPRI 21160       | HQ853596      | 90.5   |
| OQ753807                    | clone D03     | 4         | Uncultured bacterium clone B-185                         | JQ712124      | 95.62  |
| OQ753789                    | clone G01     | 2         | Uncultured bacterium clone Nit5Au0613_729                | FJ628329      | 82.5   |
| OQ753823                    | clone A02     | 2         | Uncultured Chlamydiales bacterium clone P-5              | AF364565      | 91.87  |
| OQ753780                    | clone G11     | 2         | <i>Leucobacter komagatae</i> strain Z_S_TSA 12           | KC337249      | 97.31  |
| OQ753797                    | clone E07     | 2         | uncultured marine bacterium clone 16_07_00D04            | FR683981      | 96.25  |
